# Supplementary material for: Pigmentation of White, Brown, and Green Chicken Eggshells Analyzed by Reflectance, Transmittance, and Fluorescence Spectroscopy
Source: PubMed Central journal article supplement — ChemistryOpen. 2019 Jul 23;8(8):1084–93. doi: 10.1002/open.201900154 (PMC6682939; doi:10.1002/open.201900154), 2019-07-23
Supplement: OPEN-8-1084-s001.pdf [file OPEN-8-1084-s001.pdf]

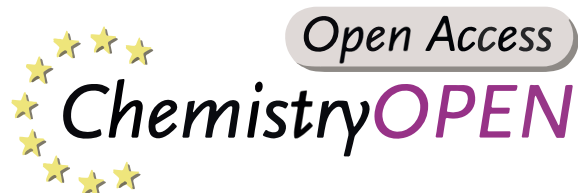

## Supporting Information

© Copyright Wiley-VCH Verlag GmbH & Co. KGaA, 69451 Weinheim, 2019

### **Pigmentation of White, Brown, and Green Chicken Eggshells Analyzed by Reflectance, Transmittance, and Fluorescence Spectroscopy**

Edwin Ostertag,\* Miriam Scholz, Julia Klein, Karsten Rebner, and Dieter Oelkrug\*© 2019 The Authors. Published by Wiley-VCH Verlag GmbH & Co. KGaA. This is an open access article under the terms of the Creative Commons Attribution Non-Commercial NoDerivs License, which permits use and distribution in any medium, provided the original work is properly cited, the use is non-commercial and no modifications or adaptations are made.

**Table of contents**

|                      |      |
|----------------------|------|
| The Bi-Layer Model   | p. 1 |
| Supplementary Fig. 1 | p. 2 |

**The Bi-Layer Model**

The reflectance and transmittance of two separate layers  $i=1,2$  are described with the KM-equations inserting a common scattering coefficient  $S$ , individual absorption coefficients  $K_1, K_2$ , and individual layer thicknesses  $d_1, d_2$  as

$$R_i = (\text{Exp}(b_i * S * d_i) - \text{Exp}(-b_i * S * d_i)) / (a_i * (\text{Exp}(b_i * S * d_i) - \text{Exp}(-b_i * S * d_i)) + b_i * (\text{Exp}(b_i * S * d_i) + \text{Exp}(-b_i * S * d_i)))$$

$$T_i = 2b_i / (a_i * (\text{Exp}(b_i * S * d_i) - \text{Exp}(-b_i * S * d_i)) + b_i * (\text{Exp}(b_i * S * d_i) + \text{Exp}(-b_i * S * d_i)))$$

where  $a_i = (K_i + S) / S$ , and  $b_i = \text{Sqr}(a_i^2 - 1)$

The two layers are added to a bi-layer with a constant total thickness  $d = d_1 + d_2$ , but variable parts. The total amount of absorber is constant  $= K_d = K_1 d_1 + K_2 d_2$ . We start from a uniform absorbing layer with  $K$  and  $d = d_1$ . Afterwards, we reduce  $d_1$  and simultaneously compress the fraction  $x$  of the absorber into the same direction. The other parameters remain unchanged. The resulting absorption coefficients are  $K_1 = x K d / d_1 + (1 - x) K$ , and  $K_2 = (1 - x) K$ . All relations are inserted in Eqs. (2) of the main article, wherefrom  $R_{12} = R_{\text{outside}}$ ,  $R_{21} = R_{\text{inside}}$ , and  $T_{12} = T_{21}$  are obtained. Fig.11 shows the results for a data set ( $d = 400 \mu\text{m}$ ,  $S = 400 \text{ cm}^{-1}$ ,  $K = 14 \text{ cm}^{-1}$ ,  $x = 0.8$ ) that is approximately able to reproduce the experiments of the brown shell in Tab. 4. Some features are noteworthy to be mentioned:

The T-curve depends strongly on the absorber compression so that it can help to determine the thickness of the outer layer  $d_1$ . This behavior is different from a transparent layer, where the transmittance is independent of the absorber compression according to Beer's law.

The  $R_{\text{inside}}$  - curve depends almost exclusively on  $K_2$  in the range of experimental interest,  $d_1/d < 0.2$ .

The formalism uses four variables ( $S, K, d_1, x$ ) but delivers only three independent experiments. We additionally determine the scattering coefficients in the uniform layer approximation from measurements out of absorption.

The calculated thickness of the strongly absorbing outer layer,  $d_1 \approx 15 \mu\text{m}$ , is consistent with SEM micrographs and our own ablation experiments. However, the calculated absorption coefficients  $K_1 \approx 300 \text{ cm}^{-1}$  and  $K_2 = 2.8 \text{ cm}^{-1}$  are far away from reality. The discrepancy is attributed in the main article to repeated Fresnel reflections at the internal shell boundaries that increase the path length of radiation and thus the absorption by about a factor of two.

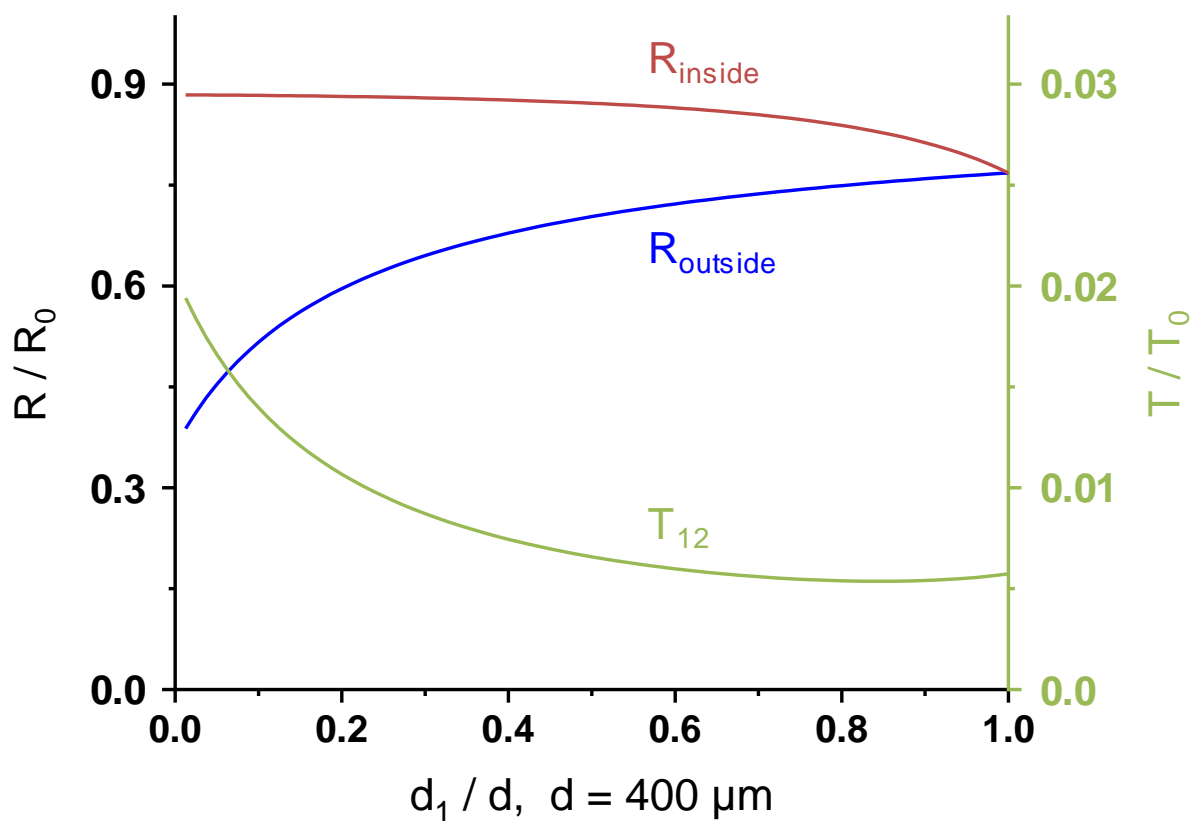

Supplementary Fig. 1: Diffuse reflectance and transmittance of an absorbing and multiple scattering bi-layer as function of the absorber distribution over the two sublayers. Absorber concentration in sublayer 1:  $K_1 = K(xd/d_1 + 1 - x)$ , in sublayer 2:  $K_2 = K(1 - x)$ . Data set for the figure:  $K = 14$ ,  $S = 400$ ,  $x = 0.8$ ,  $d = 0.04$ .
